# Supplementary material for: Long-term safety and clinical performance of kyphoplasty and SpineJack® procedures in the treatment of osteoporotic vertebral compression fractures: a pilot, monocentric, investigator-initiated study
Source: Springer Nature journal article supplement (doi:10.1007/s00198-018-4773-5), 2018-11-28
Supplement: MOESM2 [file 16301070]

ESM_2 Absolutes changes from baseline in back pain intensity and ODI score


N

Mean ± SD
Median
p-value 
intragroup
p-value
intergroupa
post-op back pain intensity (mm) 


5 days 
SJ
15
-57.5 ± 22.9
-60.0
<0.001
0.457

BKP
15
-63.9 ± 23.1
-70.0
<0.001

1 month 
SJ
15
-67.7 ± 15.5
-65.0
<0.001
0.661

BKP
15
-64.2 ± 26.0
-76.0
<0.001

3 months 
SJ
14b
-72.5 ± 12.4
-71.5
<0.001
0.331

BKP
15
-64.5 ± 28.5
-65.0
<0.001

6 months 
SJ
14 b
-72.8 ± 10.7
-73.5
<0.001
0.468 

BKP
15
-68.2 ± 21.3
-65.0
<0.001

12 months 
SJ
14 b
-75.8 ± 15.0
-80.0
<0.001
0.322

BKP
15
-68.9 ± 20.8
-70.0
<0.001

36 months 
SJ
14 b
-64.6 ± 16.1
-62.5
<0.001
0.322

BKP
14 b
-58.9 ± 14.2
-59.0
<0.001

post-op odi score


5 days 
SJ
15
-48.6 ± 21.4
-48.9
<0.001
0.692

BKP
15
-45.8 ± 17.1
-46.7
<0.001

1 month 
SJ
15
-59.2 ± 18.5
-55.5
<0.001
0.123

BKP
15
-47.8 ± 20.8
-54.6
<0.001

3 months 
SJ
14 b
-59.8 ± 13.9
-58.9
<0.001
0.140

BKP
15
-50.2 ± 19.2
-48.9
<0.001

6 months 
SJ
14 b
-61.2 ± 15.8
-62.2
<0.001
0.268

BKP
15
-53.7 ± 19.6
-55.6
<0.001

12 months 
SJ
14 b
-61.6 ± 17.0
-63.3
<0.001
0.263

BKP
15
-53.9 ± 19.4
-55.6
<0.001

36 months 
SJ
14 b
-57.2 ± 16.7
-57.8
<0.001
0.191

BKP
14 b
-49.4 ± 13.9
-48.9
<0.001

a p value was assessed using Student’s test
b Missing data due to patient’s withdrawal

Abbreviations: SJ: SpineJack®; BKP: balloon kyphoplasty
